# Supplementary material for: Tailoring the accessibility and amphiphilicity of MWW zeolites for two-phase glycerol ketalization
Source: Royal Society of Chemistry journal article supplement (doi:10.1039/d3qi01067h), 2023-01-01
Supplement: d3qi01067h1.pdf [file d3qi01067h1.pdf]

**Electronic Supplementary Information (ESI)**

**Tailoring accessibility and amphiphilicity in MWW zeolites for the two-phase glycerol ketalization**

Diego S. D. Lima<sup>a</sup>, Laura L. Silva<sup>a</sup>, Iago W. Zapelini<sup>b</sup>, Svetlana Mintova<sup>b</sup>, Leandro Martins<sup>a\*</sup>

<sup>a</sup>Universidade Estadual Paulista - Unesp, Institute of Chemistry, R. Prof. Francisco Degni, 55, 14800-900, Araraquara-SP, Brazil.

<sup>b</sup>Normandie Université, ENSICAEN, UNICAEN, CNRS, Laboratoire Catalyse et Spectrochimie (LCS), 6 Bd Maréchal Juin, 14000, Caen, France.

\*leandro.martins@unesp.br

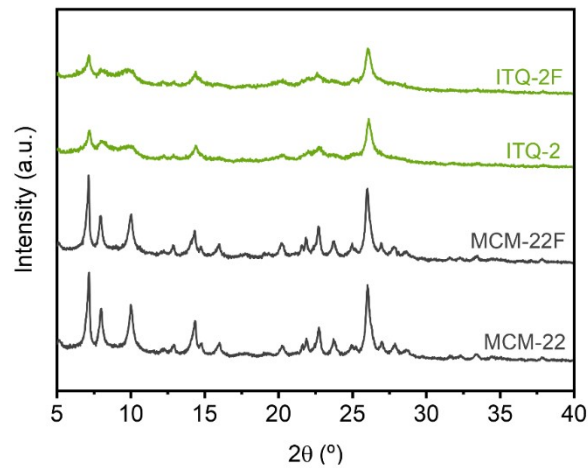

**Figure S1.** X-ray patterns of MWW samples before and after functionalization

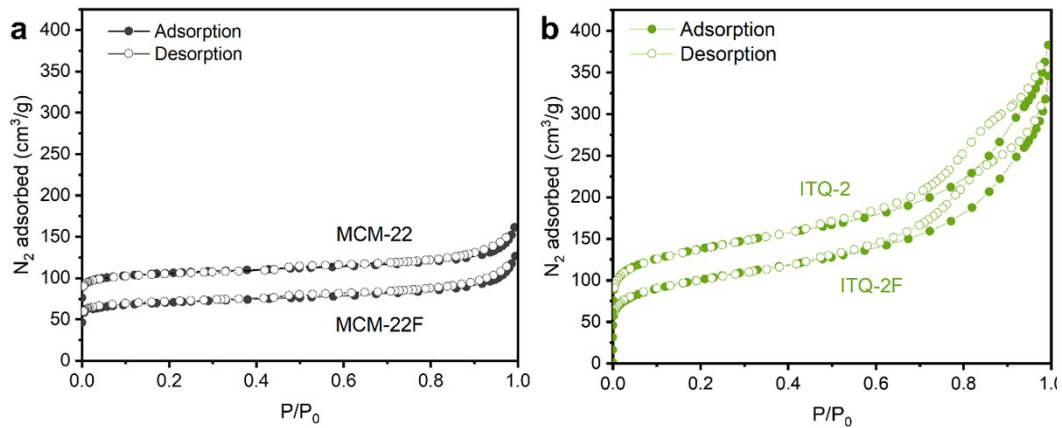

**Figure S2.** N<sub>2</sub> physisorption isotherms (a) MCM-22 structure, and (b) ITQ-2 structure.

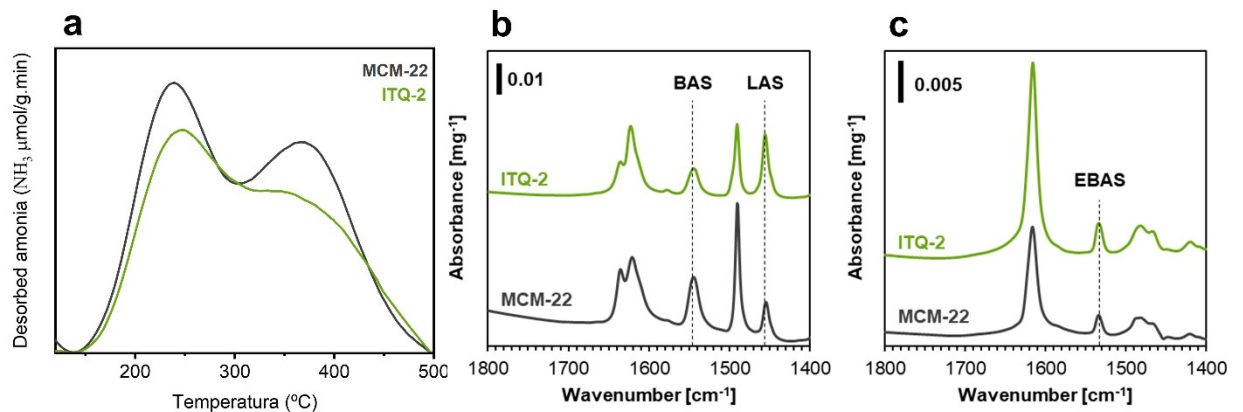

**Figure S3.** Acidity analyses (a) NH<sub>3</sub>-TPD, (b) FTIR-Py and (c) FTIR-DTBPpy.
